# Supplementary material
Source: publisher figshare collection journal article supplement (https://acs.figshare.com/ndownloader/files/4635370)
Supplement: Supplementary file 1 [file 4635370]

**TABLE S I: Concentration and temperature (T) dependent phase behavior of G<sup>a,b</sup>**

| T/K     | [G]                 |                    |                     |                                  |      |       |
|---------|---------------------|--------------------|---------------------|----------------------------------|------|-------|
|         | 5%                  | 4%                 | 2.5%                | 1.0%                             | 0.5% | 0.05% |
| 288     | GL(GL)              | GL(GL)             | GL(GL)              | L <sub>1</sub> (L <sub>1</sub> ) | L(L) | L(L)  |
| 290     | GL(GL)              | GL(GL)             | GL(GL)              | L(L)                             | L(L) | L(L)  |
| 293     | GL(GL)              | GL(GL)             | GL(M <sub>2</sub> ) | L(L)                             | L(L) | L(L)  |
| 296     | GL(GL)              | GL(GL)             | GL(L)               | L(L)                             | L(L) | L(L)  |
| 298     | GL(GL)              | M <sub>1</sub> (L) | M <sub>1</sub> (L)  | L(L)                             | L(L) | L(L)  |
| 300     | GL(L <sub>1</sub> ) | M <sub>2</sub> (L) | L <sub>1</sub> (L)  | L(L)                             | L(L) | L(L)  |
| 303     | L(L)                | L(L)               | L(L)                | L(L)                             | L(L) | L(L)  |
| 308-320 | L(L)                | L(L)               | L(L)                | L(L)                             | L(L) | L(L)  |

<sup>a</sup>GL:Gel; L:Liquid; L<sub>1</sub>:viscous liquid; M<sub>1</sub>: upper surface slightly mobile; M<sub>2</sub>: upper surface mobile only.

<sup>b</sup> Results shown in parenthesis were obtained under cooling conditions.

**TABLE S II: Surface tension ( $\gamma_G$ ) of G at different concentrations in pH9 buffer solution at 303K (A) and that of 0.05% G at different temperatures (B)**

(A)

| [G]/%                          | 0    | 0.002 | 0.005 | 0.025 | 0.05 | 0.10 | 0.20 | 0.36 | 0.52 | 0.67 | 0.80 |
|--------------------------------|------|-------|-------|-------|------|------|------|------|------|------|------|
| $\gamma_G$ /mN m <sup>-1</sup> | 66.0 | 65.6  | 63.5  | 60.3  | 58.3 | 57.1 | 56.2 | 55.2 | 54.2 | 50.8 | 50.6 |

(B)

| T/K                            | 293  | 298  | 303  | 308  | 313  |
|--------------------------------|------|------|------|------|------|
| $\gamma_G$ /mN m <sup>-1</sup> | 56.2 | 57.9 | 58.3 | 58.6 | 59.5 |

**TABLE S III: Micellization and other physicochemical parameters of ATAB in pH9 boric acid-borax buffer at 303K**

| ATAB              | cmc <sup>a,c</sup> |                    |                       | Interfacial Adsorption Parameters <sup>a</sup> |                       |             |                        | Bulk properties <sup>a</sup> |                     |                 |
|-------------------|--------------------|--------------------|-----------------------|------------------------------------------------|-----------------------|-------------|------------------------|------------------------------|---------------------|-----------------|
|                   | Tensio-<br>metry   | Conducto-<br>metry | Microcal-<br>orimetry | $\gamma_{cmc}^{d,e}$                           | $10^7 \Gamma_{max}^f$ | $A_{min}^f$ | $-\Delta G_{ad}^0{}^h$ | $f^g$                        | $-\Delta G_m^0{}^g$ | $-\Delta H_m^e$ |
| OTAB              | 0.28               | 0.24               | 0.30                  | 33.1                                           | 10.9                  | 1.53        | 76.3                   | 0.48                         | 46.0                | 15.1            |
| CTAB <sup>b</sup> | 0.83               | 0.89               | 0.95 <sup>c</sup>     | 33.2                                           | 11.9                  | 1.40        | 74.4                   | 0.68                         | 46.7                | 8.81            |
| TTAB              | 3.47               | 3.91               | 3.56                  | 32.8                                           | 12.4                  | 1.34        | 67.0                   | 0.67                         | 40.2                | 5.71            |
| DTAB              | 13.2               | 13.5               | 12.4                  | 32.9                                           | 13.5                  | 1.23        | 58.5                   | 0.63                         | 34.0                | 3.79            |

<sup>a</sup> cmc,  $\gamma_{cmc}$ ,  $\Gamma_{max}$  and  $A_{min}$ , are in mM, mN m<sup>-1</sup>, mol m<sup>-2</sup> and nm<sup>2</sup> molecule<sup>-1</sup> units respectively;  $\Delta G_{ad}^0$ ,  $\Delta G_m^0$  and  $\Delta H_m$  are in kJ mol<sup>-1</sup>.

<sup>b</sup>Cmc of CTAB determined from fluorimetry was 0.84mM.

<sup>c</sup> cmc,  $\Delta H_m$  (Temp) for CTAB: 1.07, -3.02 (293), 1.00, -4.23 (298), 0.95, -8.81 (303), 1.17, -10.77 (308) and 1.19, -12.48 (313). The cmcs are in mM,  $\Delta H_m$  in kJ mol<sup>-1</sup> and temperature in K. The van't Hoff enthalpy,  $\Delta H_m^{VH}$  (calculated following earlier procedures with  $f=0.68$ ) at 293, 298, 303, 308 and 313K were found to be -22.7, -39.7, -56.1, -71.9 and -87.3kJ mol<sup>-1</sup> respectively.<sup>53b,56</sup> The specific heat capacity at one atmospheric pressure (calculated from the slope of the linear fit between  $\Delta H_m$  and T) obtained from calorimetry ( $\Delta C_{pm}$ ) and van't Hoff method ( $\Delta C_{pm}^{VH}$ ) were -510±50 and -3230±30J K<sup>-1</sup> mol<sup>-1</sup> respectively.

<sup>d</sup>  $\gamma_{cmc}$  for pure CTAB in aqueous solution at 298, 303, 308 and 313K are 33.1, 33.5, 34.2 and 34.7 mN m<sup>-1</sup> respectively.<sup>8</sup>

<sup>e</sup>Standard deviations (SD) for cmc are ± 3%, ± 5%, ± 2%, ± 4% for tensiometric, conductometric, microcalorimetric, and fluorimetric methods respectively.

<sup>f</sup> $\Gamma_{max}$  is calculated following the Gibbs adsorption equation  $\Gamma_{max} = -1/(2.303nRT) \lim_{[ATAB] \rightarrow cmc} d\gamma/d\log[ATAB]$ , where n, R, T and [ATAB] are the number of species formed per ATAB monomer in solution (it was 2 for the surfactants by ionization), the universal gas constant, absolute temperature and the molar concentration of ATAB in solution respectively. Here concentration was used in place of activity, as the solutions in use were fairly dilute.  $A_{min}$  was obtained from the relation  $A_{min} = 10^{18}/N_A \Gamma_{max}$  in nm<sup>2</sup> molecule<sup>-1</sup>, where  $N_A$  is the Avogadro number.<sup>8,17,50,51</sup>

<sup>g</sup> The parameter  $f$  was obtained using the relation,  $f = 1 - (S_2/S_1)$ .<sup>54a</sup>  $\Delta G_m^0$  was obtained from  $\Delta G_m^0 = (1+f)RT\ln X_{cmc}$ , where  $X_{cmc}$  is the cmc of pure ATAB in the mole fraction scale at temperature T.<sup>17,50,51,54</sup>

<sup>h</sup>  $\Delta G_{ad}^0$  is calculated from the equation  $\Delta G_{ad}^0 = \Delta G_m^0 - (\pi/\Gamma_{max})$ , where  $\pi$  is the surface pressure at the saturated air/solution interface [ $\pi = \gamma_0 - \gamma_{cmc}$ , where  $\gamma_0$  and  $\gamma_{cmc}$  are the surface tensions of the buffer solution (66.0mN m<sup>-1</sup>) and that of ATAB at cmc respectively].<sup>8,17,50,51</sup>

**TABLE S IV: Interfacial adsorption and other thermodynamic parameters<sup>a</sup> for the interaction of (a) G-CTAB at varying [G], (b) 0.05% G interaction with varying ATAB and (c) 0.05% G-CTAB interaction at varying temperature**

| System | $\gamma_{T_4}$ | $10^7 \Gamma_{\max}^{T_4}$ | $A_{\min}^{T_4}$ | $f_i$     |           | $-\Delta G_i^{0\text{ b}}$ |                       | $-\Delta G_{\text{ad},T_4}^0$ |
|--------|----------------|----------------------------|------------------|-----------|-----------|----------------------------|-----------------------|-------------------------------|
|        |                |                            |                  | $f_{C_T}$ | $f_{T_4}$ | $-\Delta G_{C_T}^0$        | $-\Delta G_{m,T_4}^0$ |                               |
| (a)    |                |                            |                  |           |           |                            |                       |                               |
| 0.005% | 34.1           | 6.65                       | 2.50             | -         | 0.70      | -                          | 47.5                  | 91.7                          |
| 0.025% | 34.2           | 5.78                       | 2.87             | -         | 0.63      | -                          | 44.9                  | 90.1                          |
| 0.05%  | 34.2           | 5.52                       | 3.01             | 0.19      | 0.62      | 56.6                       | 43.8                  | 87.4                          |
| 0.1%   | 34.2           | 5.48                       | 3.03             | 0.40      | 0.54      | 65.4                       | 41.2                  | 82.9                          |
| 0.2%   | 34.4           | 4.58                       | 3.63             | 0.48      | 0.50      | 68.3                       | 39.3                  | 81.4                          |
| (b)    |                |                            |                  |           |           |                            |                       |                               |
| OTAB   | 34.2           | 9.96                       | 1.67             | 0.30      | 0.56      | 42.5                       | 45.5                  | 70.4                          |
| CTAB   | 34.2           | 5.52                       | 3.01             | 0.19      | 0.62      | 56.6                       | 43.8                  | 87.4                          |
| TTAB   | 32.6           | -                          | -                | -         | 0.66      | -                          | 39.7                  | -                             |
| DTAB   | 32.4           | -                          | -                | -         | 0.63      | -                          | 33.6                  | -                             |

(c)

| T/K | $\gamma_{T_4}$ | $10^7 \Gamma_{\max}^{T_4}$ | $A_{\min}^{T_4}$ |
|-----|----------------|----------------------------|------------------|
| 293 | 34.7           | 7.37                       | 2.25             |
| 298 | 34.5           | 5.68                       | 2.92             |
| 303 | 34.2           | 5.52                       | 3.01             |
| 308 | 33.6           | 5.36                       | 3.10             |
| 313 | 32.9           | 5.08                       | 3.27             |

<sup>a</sup> $\gamma_{T_4}$ ,  $\Gamma_{\max}^{T_4}$  and  $A_{\min}^{T_4}$  are in  $\text{mN m}^{-1}$ ,  $\text{mole m}^{-2}$  and in  $\text{nm}^2 \text{ molecule}^{-1}$  respectively;  $\Delta G_i^0$  and  $\Delta G_{\text{ad},T_4}^0$  are in  $\text{kJ mole}^{-1}$ .

<sup>b</sup>Putting f and X for the respective states  $\Delta G_i^0$ s were calculated. X refers to the mole fraction corresponding to  $C_T$  and  $T_4$  (vide. footnote g, Table SI for relevant equations).

## Legend to figure

**Figure S I.** Tensiometric, conductometric and thermometric profiles of pure ATAB dilution in pH9 buffer solution at 303K.

Main diagram displays tensiometric isotherms of DTAB and TTAB. Arrowheads indicate cmc points.

Inset: Conductometric and enthalpy profiles for pure DTAB indicating the ways to get cmc,  $f$  and  $\Delta H_m$ . For pure OTAB, cmc and  $\Delta H_m$  in the enthalpy profile were estimated following Sigmoidal-Boltzmann fitting procedure.<sup>1</sup>

## References and Notes

1. Hait, S. K.; Moulik, S. P.; Palepu, R. *Langmuir* **2002**, *18*, 2471.

## Figure

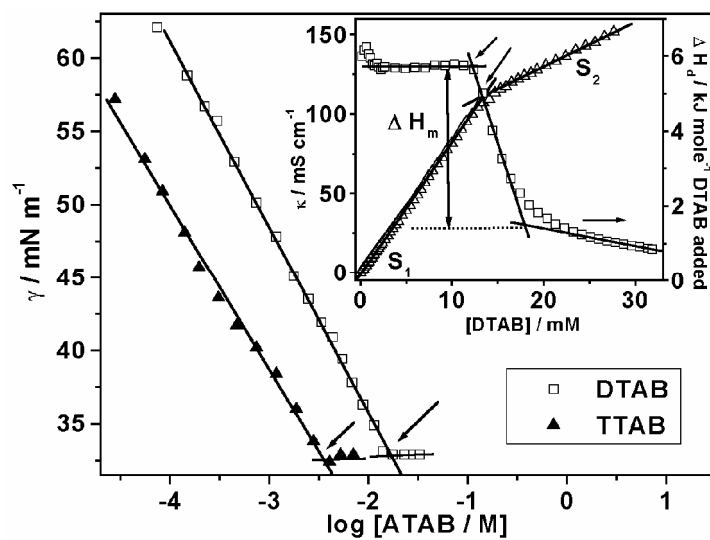

Figure S I.
